**S5 Table. qPCR primers.**

| pID (JGI) <sup>a</sup> | gene           | Name            | Sequence (5' - 3')       | source     |
|------------------------|----------------|-----------------|--------------------------|------------|
| 240086                 | <i>chs1</i>    | Ta_chs1_qRTs    | CGAGGCGAGAGATGGGTTTT     | this study |
|                        |                | Ta_chs1_qRTa    | GAGTAGACGGCAGCGAAGAA     | this study |
| 323101                 | <i>chs2</i>    | Ta_chs2_qRTs    | GAAGTCTCCGTCTTCAGCGT     | this study |
|                        |                | Ta_chs2_qRTa    | CAGATCAGCACGACACCAGT     | this study |
| 143107                 | <i>chs3</i>    | Ta_chs3_qRTs    | CCTGGCTCCCTCAAGGATG      | this study |
|                        |                | Ta_chs3_qRTa    | ACCAAGAAACGACCAGACCG     | this study |
| 248556                 | <i>chs4</i>    | Ta_chs4_qRTs    | TGTTCTCGTCATCGTCACCG     | this study |
|                        |                | Ta_chs4_qRTa    | GTTCCAAACGGGGAGAGACA     | this study |
| 142365                 | <i>chs5</i>    | Ta_chs5_qRTs    | ACCAAGAAGGGTGTGAAGCA     | this study |
|                        |                | Ta_chs5_qRTa    | CCTCAGTGGCGCTGTTGATA     | this study |
| 91144                  | <i>chs6</i>    | Ta_chs6_qRTs    | GTAGAGTCAGGCTGCGGATC     | this study |
|                        |                | Ta_chs6_qRTa    | CAAACAGGTCTTCGCACTGC     | this study |
| 154895                 | <i>chs7</i>    | Ta_chs7_qRTs    | GGTATCTGCGGTGAGACCAG     | this study |
|                        |                | Ta_chs7_qRTa    | GGTAAAACATCCGGGCAAAC     | this study |
| 161127                 | <i>chs8</i>    | Ta_chs8_qRTs    | ACTCGGAAGACAGCATCCAC     | this study |
|                        |                | Ta_chs8_qRTa    | CAATGGTGTATGCCTTGCGG     | this study |
| 28913                  | <i>cda1</i>    | Ta_cda1_qRTs    | AACTGGTTGCGACTCGGAAT     | this study |
|                        |                | Ta_cda1_qRTa    | GTAGCTGAGAAACGGTCCCC     | this study |
| 147996                 | <i>cda2</i>    | Ta_cda2_qRTs    | ACGCCACCTTCTTCGTCATT     | this study |
|                        |                | Ta_cda2_qRTa    | CTCCAGCTCGTCATTGCTCA     | this study |
| 78914                  | <i>cda3</i>    | Ta_cda3_qRTs    | CAGAAAGGGCCGCAATTACG     | this study |
|                        |                | Ta_cda3_qRTa    | TCCGCAATCCAGAGAATCCG     | this study |
| 291124                 | <i>cda4</i>    | Ta_cda4_qRTs    | ACTCACATGAGAACCAGCG      | this study |
|                        |                | Ta_cda4_qRTa    | CGACACTCCCTTTTGGTGGT     | this study |
| 292288                 | <i>cda5</i>    | Ta_cda5_qRTs    | TTTGGGCACTCGGAATCACA     | this study |
|                        |                | Ta_cda5_qRTa    | TGAAAGGTTGGAGGCGGAAA     | this study |
| 142446                 | <i>cda6</i>    | Ta_cda6_qRTs    | GGTACTTGGATGACCTGCCG     | this study |
|                        |                | Ta_cda6_qRTa    | GCCCGATACATCTGGGTGAA     | this study |
| 54365                  | <i>cho1</i>    | Ta_cho1_qRTs    | GCATTTGGGGTGACACCAAC     | this study |
|                        |                | Ta_cho1_qRTa    | TTATCGCCGCTCAGACCATC     | this study |
| 80199                  | <i>cho2</i>    | Ta_cho2_qRTs    | GCATTGATGACTTGGACGCC     | this study |
|                        |                | Ta_cho2_qRTa    | CAGCCATGACACTCAAGGGT     | this study |
| 145108                 | <i>cho3</i>    | Ta_cho3_qRTs    | CGATACCAACACAGAGCCGA     | this study |
|                        |                | Ta_cho3_qRTa    | CGTCGCCAAGGAAACCAATG     | this study |
| 197013                 | <i>cho4</i>    | Ta_cho4_qRTs    | GGAGAGGCTTTCCTGGCATT     | this study |
|                        |                | Ta_cho4_qRTa    | CAGGCTGGTAACGGGTTGAT     | this study |
| 216890                 | <i>cho5</i>    | Ta_cho5_qRTs    | CGTGACCTTTGAGCCAGAGT     | this study |
|                        |                | Ta_cho5_qRTa    | GAGAGCATCAGAGACCTCGC     | this study |
| 16857                  | <i>cho6</i>    | Ta_cho6_qRTs    | CTGGGGAGATACCAATGGCG     | this study |
|                        |                | Ta_cho6_qRTa    | ATGCCGTTACCAAAGCAAGC     | this study |
| 154960                 | <i>crh1a</i>   | Ta_crh1a_qRTs   | GGCTACACCGATTTCTCCAA     | this study |
|                        |                | Ta_crh1a_qRTa   | CTCGACCTTGATGCTCTGC      | this study |
| 311401                 | <i>crh1b</i>   | Ta_crh1b_qRTs   | GCACGCCTGATAGCTCCCCG     | this study |
|                        |                | Ta_crh1b_qRTa   | CACAACCATCAGCAGCGACG     | this study |
| 299218                 | <i>crh2</i>    | Ta_crh2_qRTs    | CGTCTGCCAAGGGTTCCGC      | this study |
|                        |                | Ta_crh2_qRTa    | TGTTGCTACCACTGTCTGCTGC   | this study |
| 136120                 | <i>nag1</i>    | Ta_nag1_qRTs    | ACTGTCGTTCAATCGTGGCT     | this study |
|                        |                | Ta_nag1_qRTa    | GTTGAAAGAGTCGCCGTTGG     | this study |
| 131598                 | <i>chi18-5</i> | Ta_chi18-5_qRTs | TGGATCTGGAAGCTGGGAGA     | this study |
|                        |                | Ta_chi18-5_qRTa | AGCTGTAGTATGCCTGTGCG     | this study |
| 302419                 | <i>prb1</i>    | Ta_prb1_qRTs    | TCCAACACTGCTACCAACACAATC | this study |
|                        |                | Ta_prb1_qRTa    | TTTCACTTCATCCTTCGCTCCA   | [2]        |

|        |             |              |                      |            |
|--------|-------------|--------------|----------------------|------------|
| 300828 | <i>tef1</i> | Ta_tef1_qRTs | GTGCGGTGGTATTGACAAGC | this study |
|        |             | Ta_tef1_qRTa | ACTTCCAGAGGGCAATGTCG | this study |
| 301975 | <i>sar1</i> | Ta_sar1_qRTs | GCCGTTTCTGAGGATGAGCT | this study |
|        |             | Ta_sar1_qRTa | CTGATACCGTCACCGTAGCC | this study |

<sup>a</sup><https://genome.jgi.doe.gov/Triat2/Triat2.home.html>, qRT-PCR primers used in this study.
