# Supplementary material for: Chitin and chitosan remodeling defines vegetative development and Trichoderma biocontrol
Source: PLOS journal article supplement (doi:10.1371/journal.ppat.1008320), 2020-02-20
Supplement: S6 (10.1371/journal.ppat.1008320.s006) [file journal.ppat.1008320.s006]

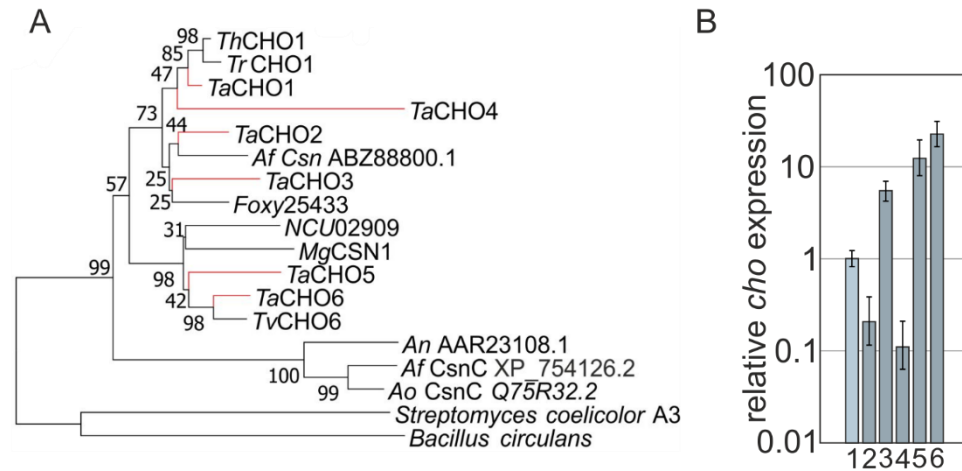

**S6 Figure. Phylogenetic analysis of all identified *T. atroviride* chitosanases and their basal transcription levels**

(A) Evolutionary tree generated by use of the whole sequence of the indicated enzymes with the phylogenetic analysis software MEGA7, 1,000 bootstraps and the neighbor-joining-method. Numbers next to nodes indicate the bootstrap value. The following enzyme sets were mined from respective databases: Af, *A. fumigatus*; An, *Aspergillus nidulans*; Ao, *Aspergillus oxysporum*; Foxy, *Fusarium oxysporum*; Mg, *Magnaporthea oryzae*; NCU, *Neurospora crassa*; Ta, *T. atroviride*; Th, *T. harzianum*; Tr, *T. reesei*; Tv, *T. virens*. *Streptomyces coelicolor* A3 and *Bacillus circulans* served as outgroup. (B) Basal expression analysis of all six identified chitosanase genes (*cho1*-*cho6*) from *T. atroviride* WT by relating transcript levels to expression of *cho1* (light grey bar) after 24 h of growth on PDA. Expression was normalized to *tef1*. qRT-PCR Data was generated from at least two independent experiments and three technical replicates and analyzed with REST-software. Mean  $\pm$  SEM are indicated.
